# Supplementary material for: Metabolomic Analysis of Skeletal Muscle in Aged Mice
Source: PubMed Central journal article supplement (PMC6639307; doi:10.1038/s41598-019-46929-8), 2019-07-18
Supplement: 41598_2019_46929_MOESM1_ESM.pdf [file 41598_2019_46929_MOESM1_ESM.pdf]

## **Metabolomic Analysis of Skeletal Muscle in Aged Mice**

Ran Uchitomi<sup>1</sup>, Yukino Hatazawa<sup>1</sup>, Nanami Senoo<sup>2</sup>, Kiyoshi Yoshioka<sup>3</sup>, Mariko Fujita<sup>1</sup>, Takahiko Shimizu<sup>4</sup>, Shinji Miura<sup>2</sup>, Yusuke Ono<sup>3</sup>, Yasutomi Kamei<sup>1\*</sup>

<sup>1</sup> Graduate School of Life and Environmental Sciences, Kyoto Prefectural University, Kyoto, Japan.

<sup>2</sup> Laboratories of Nutritional Biochemistry, Graduate School of Nutritional and Environmental Sciences, University of Shizuoka, Shizuoka, Japan.

<sup>3</sup> Institute of Molecular Embryology and Genetics, Kumamoto University, Kumamoto, Japan.

<sup>4</sup> Department of Advanced Aging Medicine, Chiba University Graduate School of Medicine, Chiba, Japan.

\*Corresponding author: Yasutomi Kamei, Professor, Laboratory of Molecular Nutrition, Graduate School of Life and Environmental Sciences, Kyoto Prefectural University, Kyoto 606-8522 Japan, E-mail: kamei@kpu.ac.jp

Supplementary Table 1. List of metabolites detected in CE-TOFMS.

"Relative area" is the peak value of each metabolite normalized by the sample volume, i.e., the relative concentration of each metabolite. "Mean" is the mean value of the relative area from each group (young and old [N = 5]). "Ratio" is the comparative value of the relative areas (old vs. young). "Not detected in young" or "Not detected in old" indicates that the peak of the metabolite was below the detection level in that group. The p-value was calculated using Welch's t-test (\*\*\*p < 0.001, \*\*p < 0.01, \*p < 0.05).

| Compound name                  | Relative Area |         |         |         |         |         |         |         |         |         |         | Comparative Analysis |                       |         |     |
|--------------------------------|---------------|---------|---------|---------|---------|---------|---------|---------|---------|---------|---------|----------------------|-----------------------|---------|-----|
|                                | Young         |         |         |         |         | Old     |         |         |         |         | Mean    |                      | Old vs Young          |         |     |
|                                | Young-1       | Young-2 | Young-3 | Young-4 | Young-5 | Old-1   | Old-2   | Old-3   | Old-4   | Old-5   | Young   | Old                  | Ratio                 | p-value |     |
| 2-Hydroxyisobutyric acid       | -             | -       | -       | -       | -       | -       | -       | -       | -       | 0.00014 | -       | 0.00014              | not detected in Young | -       |     |
| 2-Oxoisovaleric acid           | -             | -       | -       | -       | -       | -       | 0.00030 | -       | -       | -       | -       | 0.00030              | not detected in Young | -       |     |
| Cholic acid                    | -             | -       | -       | -       | -       | -       | -       | -       | 0.00129 | -       | -       | 0.00129              | not detected in Young | -       |     |
| N-Acetyllysine                 | -             | -       | -       | -       | -       | -       | 0.00026 | 0.00025 | 0.00035 | -       | -       | 0.00029              | not detected in Young | -       |     |
| Octanoic acid                  | -             | -       | -       | -       | -       | 0.00019 | -       | -       | 0.00021 | -       | -       | 0.00020              | not detected in Young | -       |     |
| S-Methylmethionine             | -             | -       | -       | -       | -       | 0.00006 | -       | -       | -       | -       | -       | 0.00006              | not detected in Young | -       |     |
| Taurocholic acid               | -             | -       | -       | -       | -       | -       | -       | -       | 0.00035 | -       | -       | 0.00035              | not detected in Young | -       |     |
| Carboxymethyllysine            | 0.00030       | 0.00026 | 0.00027 | 0.00029 | 0.00026 | 0.00185 | 0.00155 | 0.00133 | 0.00109 | 0.00111 | 0.00028 | 0.00139              | 5.00                  | 0.0015  | **  |
| 1-Methylhistamine              | 0.00004       | 0.00003 | 0.00003 | 0.00003 | 0.00003 | 0.00019 | 0.00020 | 0.00012 | 0.00017 | 0.00015 | 0.00003 | 0.00017              | 4.95                  | 0.0008  | *** |
| Histamine                      | 0.00096       | 0.00130 | 0.00091 | 0.00099 | 0.00076 | 0.00251 | 0.00285 | 0.00223 | 0.00317 | 0.00223 | 0.00098 | 0.00260              | 2.64                  | 0.0003  | *** |
| Diethanolamine                 | 0.00016       | 0.00022 | 0.00031 | 0.00017 | 0.00016 | 0.00070 | 0.00075 | 0.00038 | 0.00036 | 0.00030 | 0.00020 | 0.00050              | 2.45                  | 0.0312  | *   |
| Pantothenic acid               | 0.00040       | 0.00034 | 0.00034 | 0.00040 | 0.00041 | 0.00069 | 0.00059 | 0.00070 | 0.00099 | 0.00062 | 0.00038 | 0.00072              | 1.90                  | 0.0079  | **  |
| Thiamine                       | -             | -       | 0.00002 | 0.00002 | -       | 0.00004 | 0.00004 | -       | -       | 0.00004 | 0.00002 | 0.00004              | 1.86                  | 0.0021  | **  |
| Homocarnosine                  | 0.04865       | 0.04346 | 0.05429 | 0.03809 | 0.04439 | 0.07392 | 0.08117 | 0.08164 | 0.08955 | 0.09777 | 0.04578 | 0.08481              | 1.85                  | 0.0001  | *** |
| Acetylcholine                  | 0.00011       | 0.00012 | 0.00012 | 0.00009 | -       | 0.00019 | 0.00017 | 0.00021 | 0.00020 | 0.00025 | 0.00011 | 0.00020              | 1.84                  | 0.0011  | **  |
| Guanosine                      | 0.00003       | 0.00006 | -       | 0.00004 | 0.00003 | 0.00006 | 0.00007 | 0.00006 | 0.00011 | 0.00005 | 0.00004 | 0.00007              | 1.79                  | 0.0340  | *   |
| Argininosuccinic acid          | 0.00018       | 0.00019 | 0.00016 | 0.00015 | 0.00013 | 0.00030 | 0.00044 | 0.00012 | 0.00031 | 0.00026 | 0.00016 | 0.00029              | 1.77                  | 0.0735  |     |
| N8-Acetylspermidine            | -             | 0.00003 | 0.00003 | -       | -       | 0.00004 | -       | -       | -       | 0.00005 | 0.00003 | 0.00005              | 1.71                  | 0.0698  |     |
| Serotonin                      | 0.00002       | -       | 0.00003 | 0.00003 | -       | -       | 0.00006 | 0.00004 | 0.00004 | 0.00004 | 0.00003 | 0.00004              | 1.69                  | 0.0119  | *   |
| Cysteine glutathione disulfide | 0.00003       | 0.00003 | 0.00004 | 0.00002 | 0.00003 | 0.00005 | 0.00004 | 0.00005 | 0.00007 | 0.00003 | 0.00003 | 0.00005              | 1.65                  | 0.0185  | *   |
| myo-Inositol 1-phosphate       | 0.00145       | 0.00134 | 0.00132 | 0.00104 | 0.00109 | 0.00184 | 0.00189 | 0.00213 | 0.00228 | 0.00199 | 0.00125 | 0.00203              | 1.63                  | 0.0001  | *** |
| myo-Inositol 3-phosphate       |               |         |         |         |         |         |         |         |         |         |         |                      |                       |         |     |
| IMP                            | 0.00728       | 0.00452 | 0.00315 | 0.00541 | 0.00312 | 0.01219 | 0.00489 | 0.00512 | 0.00517 | 0.01018 | 0.00469 | 0.00751              | 1.60                  | 0.1534  |     |
| Nw-Methylarginine              | 0.00006       | -       | -       | -       | -       | -       | 0.00009 | -       | -       | -       | 0.00006 | 0.00009              | 1.53                  | -       |     |
| Urocanic acid                  | 0.00033       | 0.00009 | -       | 0.00011 | 0.00013 | -       | 0.00027 | 0.00018 | 0.00029 | -       | 0.00017 | 0.00025              | 1.48                  | 0.2633  |     |
| Inosine                        | 0.00111       | 0.00138 | 0.00070 | 0.00103 | 0.00077 | 0.00185 | 0.00149 | 0.00119 | 0.00129 | 0.00152 | 0.00100 | 0.00147              | 1.47                  | 0.0224  | *   |
| XC0137                         | 0.00011       | 0.00011 | 0.00015 | 0.00010 | 0.00007 | 0.00016 | 0.00019 | 0.00011 | 0.00014 | 0.00019 | 0.00011 | 0.00016              | 1.44                  | 0.0434  | *   |
| 4-Methyl-2-oxovaleric acid     |               |         |         |         |         |         |         |         |         |         |         |                      |                       |         |     |
| 3-Methyl-2-oxovaleric acid     | 0.00043       | -       | -       | 0.00029 | -       | 0.00062 | 0.00055 | -       | 0.00040 | 0.00047 | 0.00036 | 0.00051              | 1.41                  | 0.2381  |     |
| Glycerophosphocholine          | 0.00267       | 0.00458 | 0.00328 | 0.00368 | 0.00307 | 0.00388 | 0.00472 | 0.00538 | 0.00506 | 0.00494 | 0.00346 | 0.00480              | 1.39                  | 0.0124  | *   |
| Stachydrine                    | 0.00249       | 0.00189 | 0.00178 | 0.00172 | 0.00140 | 0.00226 | 0.00295 | 0.00232 | 0.00227 | 0.00275 | 0.00185 | 0.00251              | 1.36                  | 0.0211  | *   |
| Adenosine                      | 0.00090       | 0.00168 | 0.00089 | 0.00117 | 0.00095 | 0.00161 | 0.00182 | 0.00117 | 0.00148 | 0.00137 | 0.00112 | 0.00149              | 1.34                  | 0.0807  |     |
| S-Adenosylmethionine           | 0.00051       | 0.00046 | 0.00045 | 0.00047 | 0.00037 | 0.00063 | 0.00059 | 0.00063 | 0.00064 | 0.00052 | 0.00045 | 0.00060              | 1.33                  | 0.0015  | **  |
| Uric acid                      | 0.00034       | 0.00024 | 0.00024 | 0.00022 | 0.00023 | 0.00039 | 0.00029 | 0.00025 | 0.00037 | 0.00041 | 0.00026 | 0.00034              | 1.33                  | 0.0547  |     |
| Citric acid                    | 0.00826       | 0.00891 | 0.00662 | 0.00733 | 0.00721 | 0.01005 | 0.01001 | 0.00943 | 0.00936 | 0.01205 | 0.00767 | 0.01018              | 1.33                  | 0.0045  | **  |
| XC0016                         | 0.00028       | 0.00021 | 0.00025 | 0.00026 | 0.00027 | 0.00033 | 0.00025 | 0.00032 | 0.00037 | 0.00039 | 0.00025 | 0.00033              | 1.32                  | 0.0265  | *   |
| Phe                            | 0.01129       | 0.01290 | 0.01128 | 0.01005 | 0.01120 | 0.01277 | 0.01562 | 0.01110 | 0.01742 | 0.01724 | 0.01134 | 0.01483              | 1.31                  | 0.0468  | *   |
| p-Toluic acid                  |               |         |         |         |         |         |         |         |         |         |         |                      |                       |         |     |
| m-Toluic acid                  | 0.00034       | 0.00019 | 0.00016 | 0.00023 | -       | 0.00035 | 0.00028 | 0.00025 | 0.00032 | 0.00029 | 0.00023 | 0.00030              | 1.30                  | 0.1691  |     |
| o-Toluic acid                  |               |         |         |         |         |         |         |         |         |         |         |                      |                       |         |     |
| XA0017                         | 0.00015       | -       | 0.00011 | -       | -       | -       | -       | -       | 0.00017 | -       | 0.00013 | 0.00017              | 1.30                  | -       |     |
| Glu-Glu                        | 0.00004       | -       | -       | 0.00004 | -       | 0.00004 | 0.00005 | 0.00004 | 0.00007 | -       | 0.00004 | 0.00005              | 1.29                  | 0.1901  |     |
| Cytidine                       | 0.00014       | 0.00017 | 0.00017 | 0.00017 | 0.00012 | 0.00016 | 0.00014 | 0.00026 | 0.00027 | 0.00016 | 0.00015 | 0.00020              | 1.28                  | 0.2118  |     |

|                                       |         |         |         |         |         |         |         |         |         |         |         |         |      |        |    |
|---------------------------------------|---------|---------|---------|---------|---------|---------|---------|---------|---------|---------|---------|---------|------|--------|----|
| N-Acetylaspartic acid                 | 0.00033 | 0.00072 | 0.00037 | 0.00048 | 0.00037 | 0.00045 | 0.00040 | 0.00066 | 0.00074 | 0.00064 | 0.00045 | 0.00058 | 1.27 | 0.2356 |    |
| 2-Hydroxyglutaric acid                | 0.00074 | 0.00064 | 0.00052 | 0.00055 | 0.00052 | 0.00076 | 0.00076 | 0.00058 | 0.00063 | 0.00098 | 0.00059 | 0.00074 | 1.26 | 0.1098 |    |
| His                                   | 0.00956 | 0.01006 | 0.01162 | 0.01097 | 0.00981 | 0.01181 | 0.01205 | 0.01121 | 0.01726 | 0.01285 | 0.01040 | 0.01304 | 1.25 | 0.0717 |    |
| Threonic acid                         | 0.00018 | 0.00016 | 0.00016 | 0.00020 | 0.00020 | 0.00026 | 0.00025 | 0.00024 | 0.00018 | 0.00021 | 0.00018 | 0.00023 | 1.25 | 0.0329 | *  |
| Isethionic acid                       | 0.00042 | 0.00035 | 0.00033 | 0.00035 | 0.00037 | 0.00047 | 0.00047 | 0.00041 | 0.00044 | 0.00048 | 0.00036 | 0.00046 | 1.25 | 0.0017 | ** |
| XA0065                                | 0.00018 | 0.00020 | 0.00016 | 0.00020 | 0.00018 | 0.00022 | 0.00019 | 0.00028 | 0.00025 | 0.00019 | 0.00018 | 0.00023 | 1.25 | 0.0631 |    |
| Tyr                                   | 0.00886 | 0.01087 | 0.00900 | 0.00701 | 0.01191 | 0.01201 | 0.01478 | 0.00784 | 0.01183 | 0.01262 | 0.00953 | 0.01181 | 1.24 | 0.1468 |    |
| Trp                                   | 0.00219 | 0.00228 | 0.00207 | 0.00170 | 0.00185 | 0.00233 | 0.00268 | 0.00191 | 0.00295 | 0.00261 | 0.00202 | 0.00250 | 1.24 | 0.0558 |    |
| Gln                                   | 0.10350 | 0.11148 | 0.12828 | 0.10624 | 0.11397 | 0.13057 | 0.13534 | 0.13681 | 0.16310 | 0.12758 | 0.11269 | 0.13868 | 1.23 | 0.0114 | *  |
| Ethanolamine phosphate                | 0.00070 | 0.00098 | 0.00073 | 0.00080 | 0.00066 | 0.00097 | 0.00092 | 0.00100 | 0.00105 | 0.00079 | 0.00077 | 0.00095 | 1.22 | 0.0434 | *  |
| Fructose 6-phosphate                  | 0.02243 | 0.00846 | 0.01966 | 0.00784 | 0.01139 | 0.01812 | 0.01488 | 0.01479 | 0.01224 | 0.02514 | 0.01396 | 0.01703 | 1.22 | 0.4351 |    |
| Glucose 6-phosphate                   | 0.08798 | 0.03265 | 0.06730 | 0.03138 | 0.04449 | 0.06923 | 0.05441 | 0.05237 | 0.04520 | 0.09792 | 0.05276 | 0.06382 | 1.21 | 0.4645 |    |
| GABA                                  | 0.00043 | -       | -       | -       | -       | 0.00053 | -       | -       | 0.00047 | 0.00056 | 0.00043 | 0.00052 | 1.21 | -      |    |
| 3-Hydroxybutyric acid                 | 0.00146 | 0.00144 | 0.00118 | 0.00096 | 0.00112 | 0.00218 | 0.00127 | 0.00104 | 0.00113 | 0.00181 | 0.00123 | 0.00149 | 1.21 | 0.3331 |    |
| Trimethylamine N-oxide                | 0.00056 | 0.00049 | 0.00053 | 0.00056 | 0.00055 | 0.00072 | 0.00071 | 0.00060 | 0.00031 | 0.00086 | 0.00054 | 0.00064 | 1.19 | 0.3347 |    |
| CMP-N-acetylneuraminate               | 0.00021 | 0.00018 | 0.00020 | 0.00017 | 0.00023 | 0.00025 | 0.00022 | 0.00025 | 0.00023 | 0.00022 | 0.00020 | 0.00023 | 1.19 | 0.0214 | *  |
| Urea                                  | 0.28760 | 0.26410 | 0.23429 | 0.22951 | 0.21853 | 0.29611 | 0.33959 | 0.25912 | 0.16226 | 0.38700 | 0.24681 | 0.28881 | 1.17 | 0.3455 |    |
| 1-Aminocyclopropane-1-carboxylic acid |         |         |         |         |         |         |         |         |         |         |         |         |      |        |    |
| Homoserinelactone                     | 0.00011 | 0.00013 | 0.00010 | 0.00009 | -       | 0.00013 | 0.00013 | 0.00008 | 0.00015 | 0.00013 | 0.00011 | 0.00012 | 1.16 | 0.2178 |    |
| UDP-glucose                           |         |         |         |         |         |         |         |         |         |         |         |         |      |        |    |
| UDP-galactose                         | 0.00060 | 0.00051 | 0.00063 | 0.00061 | 0.00057 | 0.00059 | 0.00061 | 0.00073 | 0.00070 | 0.00077 | 0.00059 | 0.00068 | 1.16 | 0.0556 |    |
| 5'-Deoxy-5'-methylthioadenosine       | 0.00004 | 0.00004 | 0.00005 | 0.00003 | 0.00002 | 0.00005 | 0.00004 | 0.00003 | 0.00005 | 0.00003 | 0.00004 | 0.00004 | 1.16 | 0.3474 |    |
| Hypoxanthine                          | 0.00060 | 0.00066 | 0.00037 | 0.00054 | 0.00041 | 0.00074 | 0.00065 | 0.00050 | 0.00054 | 0.00055 | 0.00052 | 0.00060 | 1.16 | 0.2722 |    |
| Lauric acid                           | 0.00048 | 0.00048 | 0.00049 | 0.00049 | 0.00043 | 0.00059 | 0.00067 | 0.00054 | 0.00052 | 0.00042 | 0.00047 | 0.00055 | 1.16 | 0.1494 |    |
| Glucose 1-phosphate                   | 0.00514 | 0.00208 | 0.00436 | 0.00193 | 0.00269 | 0.00408 | 0.00313 | 0.00301 | 0.00273 | 0.00572 | 0.00324 | 0.00374 | 1.15 | 0.5722 |    |
| Glutathione (GSSG)_divalent           | 0.02384 | 0.01825 | 0.02639 | 0.02555 | 0.02500 | 0.03077 | 0.03096 | 0.02759 | 0.02303 | 0.02481 | 0.02381 | 0.02743 | 1.15 | 0.1296 |    |
| 5-Oxoproline                          | 0.00031 | 0.00019 | 0.00018 | 0.00021 | 0.00021 | 0.00022 | 0.00031 | 0.00023 | 0.00034 | 0.00017 | 0.00022 | 0.00025 | 1.15 | 0.4270 |    |
| N,N-Dimethylglycine                   | 0.00071 | -       | -       | -       | -       | 0.00081 | -       | -       | -       | -       | 0.00071 | 0.00081 | 1.14 | -      |    |
| Gly-Gly                               | 0.00021 | 0.00017 | 0.00020 | 0.00016 | 0.00026 | 0.00018 | 0.00015 | 0.00027 | 0.00028 | 0.00026 | 0.00020 | 0.00023 | 1.14 | 0.4084 |    |
| Hypotaurine                           | 0.00416 | 0.00510 | 0.00443 | 0.00363 | 0.00289 | 0.00353 | 0.00398 | 0.00358 | 0.00931 | 0.00258 | 0.00404 | 0.00459 | 1.14 | 0.6782 |    |
| Leu                                   | 0.02022 | 0.03128 | 0.02519 | 0.02382 | 0.02119 | 0.02892 | 0.02913 | 0.02309 | 0.02564 | 0.03157 | 0.02434 | 0.02767 | 1.14 | 0.2135 |    |
| Putrescine                            | 0.00013 | 0.00017 | 0.00020 | 0.00026 | 0.00028 | 0.00023 | 0.00018 | 0.00028 | 0.00021 | 0.00029 | 0.00021 | 0.00024 | 1.13 | 0.4642 |    |
| Ile                                   | 0.01297 | 0.01831 | 0.01438 | 0.01338 | 0.01142 | 0.01764 | 0.01556 | 0.01508 | 0.01488 | 0.01625 | 0.01409 | 0.01588 | 1.13 | 0.2110 |    |
| UDP-N-acetylgalactosamine             |         |         |         |         |         |         |         |         |         |         |         |         |      |        |    |
| UDP-N-acetylglucosamine               | 0.00057 | 0.00059 | 0.00056 | 0.00063 | 0.00051 | 0.00062 | 0.00050 | 0.00067 | 0.00087 | 0.00055 | 0.00057 | 0.00064 | 1.12 | 0.3460 |    |
| Pelargonic acid                       | 0.00037 | 0.00028 | 0.00026 | 0.00025 | 0.00034 | 0.00034 | 0.00032 | 0.00029 | 0.00039 | 0.00036 | 0.00030 | 0.00034 | 1.12 | 0.2375 |    |
| Triethanolamine                       | 0.00006 | -       | 0.00010 | -       | 0.00011 | 0.00007 | -       | 0.00010 | -       | 0.00014 | 0.00009 | 0.00010 | 1.12 | 0.6834 |    |
| FAD_divalent                          | -       | 0.00019 | 0.00015 | -       | 0.00018 | 0.00018 | 0.00020 | 0.00017 | 0.00021 | 0.00019 | 0.00017 | 0.00019 | 1.11 | 0.1972 |    |
| Fumaric acid                          | 0.00215 | 0.00206 | 0.00164 | 0.00167 | 0.00170 | 0.00247 | 0.00230 | 0.00187 | 0.00158 | 0.00201 | 0.00184 | 0.00205 | 1.11 | 0.3223 |    |
| Betaine                               | 0.01011 | 0.01315 | 0.01104 | 0.00881 | 0.00826 | 0.00965 | 0.01115 | 0.01072 | 0.01694 | 0.00838 | 0.01027 | 0.01137 | 1.11 | 0.5433 |    |
| Methionine sulfoxide                  | 0.00049 | 0.00042 | 0.00044 | 0.00049 | 0.00034 | 0.00070 | 0.00047 | 0.00025 | 0.00027 | 0.00069 | 0.00043 | 0.00048 | 1.10 | 0.6920 |    |
| Malic acid                            | 0.01773 | 0.01576 | 0.01148 | 0.01412 | 0.01317 | 0.01891 | 0.01770 | 0.01481 | 0.01216 | 0.01571 | 0.01445 | 0.01586 | 1.10 | 0.4016 |    |
| 5-Hydroxylysine                       | 0.00013 | 0.00018 | 0.00016 | 0.00020 | 0.00013 | 0.00018 | 0.00023 | -       | 0.00010 | 0.00019 | 0.00016 | 0.00018 | 1.09 | 0.6583 |    |
| Taurine                               | 0.24377 | 0.26238 | 0.25518 | 0.24311 | 0.24839 | 0.26910 | 0.27878 | 0.24779 | 0.27494 | 0.28651 | 0.25057 | 0.27142 | 1.08 | 0.0305 | *  |
| Gly-Asp                               | 0.00021 | 0.00027 | 0.00028 | 0.00025 | 0.00023 | 0.00030 | 0.00024 | 0.00031 | 0.00027 | 0.00025 | 0.00025 | 0.00027 | 1.08 | 0.3114 |    |
| γ-Butyrobetaine                       | 0.00304 | 0.00266 | 0.00271 | 0.00267 | 0.00280 | 0.00240 | 0.00307 | 0.00263 | 0.00402 | 0.00277 | 0.00278 | 0.00298 | 1.07 | 0.5181 |    |
| Malonylcarnitine                      | 0.00007 | 0.00007 | 0.00006 | 0.00009 | 0.00007 | -       | 0.00011 | 0.00006 | 0.00006 | 0.00008 | 0.00007 | 0.00008 | 1.07 | 0.6705 |    |
| NADP+                                 | 0.00027 | 0.00030 | 0.00029 | 0.00026 | 0.00023 | 0.00030 | 0.00029 | 0.00024 | 0.00033 | 0.00027 | 0.00027 | 0.00029 | 1.07 | 0.3571 |    |
| Terephthalic acid                     | 0.00029 | 0.00033 | 0.00028 | 0.00029 | 0.00032 | 0.00033 | 0.00033 | 0.00034 | 0.00030 | 0.00030 | 0.00030 | 0.00032 | 1.07 | 0.1500 |    |
| Arg                                   | 0.01476 | 0.01860 | 0.01943 | 0.01710 | 0.01470 | 0.01866 | 0.02445 | 0.00697 | 0.02316 | 0.01660 | 0.01692 | 0.01797 | 1.06 | 0.7603 |    |
| Succinic acid                         | 0.01206 | 0.00988 | 0.01010 | 0.01045 | 0.01203 | 0.01314 | 0.00949 | 0.01080 | 0.01170 | 0.01233 | 0.01090 | 0.01149 | 1.05 | 0.4772 |    |

|                           |         |         |         |         |         |         |         |         |         |         |         |         |      |        |    |
|---------------------------|---------|---------|---------|---------|---------|---------|---------|---------|---------|---------|---------|---------|------|--------|----|
| Pyridoxamine 5'-phosphate | 0.00019 | 0.00025 | 0.00019 | 0.00024 | 0.00024 | 0.00022 | 0.00029 | 0.00022 | 0.00025 | 0.00020 | 0.00022 | 0.00023 | 1.05 | 0.5774 |    |
| XA0027                    | 0.00019 | -       | -       | 0.00018 | -       | 0.00018 | -       | 0.00016 | 0.00024 | -       | 0.00019 | 0.00019 | 1.04 | 0.7913 |    |
| Pipecolic acid            | 0.00140 | 0.00137 | 0.00137 | 0.00148 | 0.00133 | 0.00137 | 0.00193 | 0.00128 | 0.00086 | 0.00175 | 0.00139 | 0.00144 | 1.03 | 0.8151 |    |
| 4-Guanidinobutyric acid   | 0.00012 | -       | -       | 0.00012 | 0.00012 | -       | 0.00013 | 0.00012 | -       | 0.00013 | 0.00012 | 0.00013 | 1.03 | 0.3233 |    |
| Trigonelline              | 0.00047 | 0.00043 | 0.00045 | 0.00052 | 0.00032 | 0.00040 | 0.00056 | 0.00034 | 0.00029 | 0.00065 | 0.00044 | 0.00045 | 1.03 | 0.8848 |    |
| trans-Glutaconic acid     | 0.00068 | -       | -       | -       | -       | 0.00064 | 0.00074 | -       | 0.00052 | 0.00089 | 0.00068 | 0.00070 | 1.03 | -      |    |
| Glycerol                  | 0.08445 | 0.06145 | 0.08006 | 0.05397 | 0.05179 | 0.04782 | 0.08066 | 0.07566 | 0.05811 | 0.07765 | 0.06634 | 0.06798 | 1.02 | 0.8644 |    |
| S-Adenosylhomocysteine    | 0.00005 | 0.00004 | 0.00006 | 0.00004 | 0.00005 | 0.00006 | 0.00006 | 0.00004 | 0.00004 | 0.00004 | 0.00005 | 0.00005 | 1.02 | 0.8863 |    |
| Carnosine                 | 0.08153 | 0.08073 | 0.11021 | 0.07015 | 0.08910 | 0.08881 | 0.09044 | 0.08470 | 0.07044 | 0.10625 | 0.08635 | 0.08813 | 1.02 | 0.8448 |    |
| 2'-Deoxycytidine          | 0.00007 | 0.00006 | 0.00006 | 0.00005 | 0.00005 | 0.00005 | 0.00005 | 0.00006 | 0.00006 | 0.00007 | 0.00006 | 0.00006 | 1.02 | 0.8681 |    |
| Val                       | 0.02642 | 0.03816 | 0.03349 | 0.02969 | 0.02984 | 0.03411 | 0.03663 | 0.02649 | 0.02776 | 0.03504 | 0.03152 | 0.03200 | 1.02 | 0.8702 |    |
| Ser                       | 0.01479 | 0.01779 | 0.02292 | 0.01926 | 0.01871 | 0.01699 | 0.01935 | 0.01717 | 0.02384 | 0.01718 | 0.01869 | 0.01891 | 1.01 | 0.9115 |    |
| CoA_divalent              | 0.00040 | 0.00050 | 0.00044 | 0.00033 | 0.00030 | 0.00037 | 0.00038 | 0.00036 | 0.00045 | 0.00042 | 0.00039 | 0.00040 | 1.01 | 0.9173 |    |
| Lactic acid               | 0.22559 | 0.21733 | 0.16937 | 0.23153 | 0.22475 | 0.24335 | 0.22833 | 0.18630 | 0.19570 | 0.21935 | 0.21371 | 0.21461 | 1.00 | 0.9552 |    |
| N6,N6,N6-Trimethyllysine  | 0.00094 | 0.00111 | 0.00128 | 0.00133 | 0.00118 | 0.00105 | 0.00139 | 0.00118 | 0.00122 | 0.00102 | 0.00117 | 0.00117 | 1.00 | 0.9722 |    |
| CTP                       | 0.00093 | 0.00094 | 0.00093 | 0.00091 | 0.00102 | 0.00100 | 0.00086 | 0.00103 | 0.00090 | 0.00095 | 0.00095 | 0.00095 | 1.00 | 0.9883 |    |
| Asp                       | 0.00585 | 0.00782 | 0.00780 | 0.00770 | 0.00558 | 0.00543 | 0.01024 | 0.00779 | 0.00520 | 0.00597 | 0.00695 | 0.00692 | 1.00 | 0.9813 |    |
| 1-Methylhistidine         |         |         |         |         |         |         |         |         |         |         |         |         |      |        |    |
| 3-Methylhistidine         | 0.00153 | 0.00151 | 0.00175 | 0.00167 | 0.00135 | 0.00137 | 0.00184 | 0.00145 | 0.00125 | 0.00184 | 0.00156 | 0.00155 | 0.99 | 0.9455 |    |
| XC0071                    | -       | 0.00004 | -       | 0.00006 | -       | -       | -       | -       | 0.00005 | -       | 0.00005 | 0.00005 | 0.99 | -      |    |
| SDMA                      | -       | 0.00007 | 0.00008 | 0.00008 | 0.00009 | -       | -       | -       | 0.00008 | -       | 0.00008 | 0.00008 | 0.99 | 0.8327 |    |
| Glu                       | 0.05847 | 0.07433 | 0.06179 | 0.06015 | 0.05571 | 0.05755 | 0.08559 | 0.06167 | 0.04869 | 0.05287 | 0.06209 | 0.06127 | 0.99 | 0.9135 |    |
| S-Methylcysteine          | 0.00013 | 0.00013 | 0.00015 | 0.00012 | 0.00014 | 0.00012 | 0.00015 | 0.00017 | 0.00009 | -       | 0.00013 | 0.00013 | 0.99 | 0.9217 |    |
| Adenine                   | 0.00042 | 0.00039 | 0.00039 | 0.00033 | 0.00035 | 0.00045 | 0.00031 | 0.00032 | 0.00041 | 0.00035 | 0.00038 | 0.00037 | 0.98 | 0.8230 |    |
| Asn                       | 0.00351 | 0.00432 | 0.00552 | 0.00460 | 0.00504 | 0.00379 | 0.00435 | 0.00370 | 0.00619 | 0.00440 | 0.00460 | 0.00448 | 0.97 | 0.8433 |    |
| Citrulline                | 0.00931 | 0.01003 | 0.00935 | 0.00773 | 0.00749 | 0.00737 | 0.01014 | 0.00653 | 0.01134 | 0.00739 | 0.00878 | 0.00855 | 0.97 | 0.8346 |    |
| Uridine                   | 0.00028 | 0.00024 | -       | 0.00023 | 0.00021 | 0.00023 | 0.00021 | 0.00022 | 0.00026 | -       | 0.00024 | 0.00023 | 0.97 | 0.6424 |    |
| 1-Methyladenosine         | 0.00004 | 0.00004 | 0.00004 | 0.00004 | 0.00005 | 0.00004 | -       | 0.00004 | 0.00005 | -       | 0.00004 | 0.00004 | 0.97 | 0.6790 |    |
| Homocitrulline            | 0.00044 | 0.00046 | 0.00042 | 0.00044 | 0.00039 | 0.00044 | 0.00048 | 0.00046 | 0.00034 | 0.00036 | 0.00043 | 0.00041 | 0.96 | 0.6041 |    |
| Ethanolamine              | 0.00127 | 0.00120 | 0.00145 | 0.00132 | 0.00137 | 0.00080 | 0.00099 | 0.00116 | 0.00249 | 0.00090 | 0.00132 | 0.00127 | 0.96 | 0.8757 |    |
| ADP                       | 0.00217 | 0.00239 | 0.00172 | 0.00258 | 0.00214 | 0.00212 | 0.00181 | 0.00271 | 0.00216 | 0.00174 | 0.00220 | 0.00211 | 0.96 | 0.7026 |    |
| Met                       | 0.00463 | 0.00647 | 0.00710 | 0.00479 | 0.00575 | 0.00618 | 0.00615 | 0.00409 | 0.00515 | 0.00597 | 0.00575 | 0.00551 | 0.96 | 0.7110 |    |
| Creatinine                | 0.00409 | 0.00378 | 0.00434 | 0.00382 | 0.00376 | 0.00324 | 0.00364 | 0.00376 | 0.00351 | 0.00473 | 0.00396 | 0.00378 | 0.95 | 0.5394 |    |
| Creatine                  | 0.07496 | 0.07373 | 0.06539 | 0.07720 | 0.07329 | 0.07184 | 0.07069 | 0.06506 | 0.06902 | 0.07088 | 0.07291 | 0.06950 | 0.95 | 0.1893 |    |
| Choline                   | 0.00953 | 0.01143 | 0.01097 | 0.00903 | 0.00939 | 0.00805 | 0.00688 | 0.01023 | 0.01684 | 0.00587 | 0.01007 | 0.00957 | 0.95 | 0.8170 |    |
| 4-Methylpyrazole          | -       | -       | 0.00016 | -       | 0.00011 | -       | 0.00011 | -       | 0.00013 | 0.00014 | 0.00013 | 0.00013 | 0.95 | 0.8350 |    |
| ADMA                      | 0.00018 | 0.00016 | 0.00018 | 0.00015 | 0.00015 | 0.00017 | 0.00019 | 0.00013 | 0.00016 | 0.00013 | 0.00017 | 0.00016 | 0.95 | 0.5434 |    |
| O-Acetylhomoserine        |         |         |         |         |         |         |         |         |         |         |         |         |      |        |    |
| 2-Amino adipic acid       | 0.00050 | 0.00039 | 0.00049 | 0.00044 | 0.00038 | 0.00038 | 0.00047 | 0.00046 | 0.00029 | 0.00048 | 0.00044 | 0.00042 | 0.95 | 0.6193 |    |
| O-Acetylcarnitine         | 0.03154 | 0.03172 | 0.02825 | 0.02839 | 0.02831 | 0.02612 | 0.03010 | 0.02491 | 0.02871 | 0.02990 | 0.02964 | 0.02795 | 0.94 | 0.2373 |    |
| Diethylaminomalonic acid  | 0.00028 | 0.00028 | 0.00033 | 0.00031 | 0.00033 | 0.00023 | 0.00034 | 0.00027 | 0.00030 | 0.00031 | 0.00031 | 0.00029 | 0.94 | 0.4088 |    |
| Dyphylline                | 0.00082 | 0.00055 | 0.00058 | 0.00059 | 0.00045 | 0.00049 | 0.00053 | 0.00052 | 0.00048 | 0.00078 | 0.00060 | 0.00056 | 0.94 | 0.6542 |    |
| Thr                       | 0.01681 | 0.02521 | 0.02783 | 0.02326 | 0.02071 | 0.02365 | 0.02388 | 0.01793 | 0.01828 | 0.02265 | 0.02277 | 0.02128 | 0.93 | 0.5384 |    |
| ATP                       | 0.21578 | 0.20119 | 0.21291 | 0.20313 | 0.20465 | 0.18814 | 0.19016 | 0.19749 | 0.19533 | 0.18738 | 0.20753 | 0.19170 | 0.92 | 0.0026 | ** |
| GTP                       | 0.00294 | 0.00305 | 0.00325 | 0.00279 | 0.00274 | 0.00259 | 0.00245 | 0.00313 | 0.00291 | 0.00252 | 0.00295 | 0.00272 | 0.92 | 0.1775 |    |
| Nicotinamide              | 0.01081 | 0.01288 | 0.01033 | 0.01399 | 0.01329 | 0.01118 | 0.01316 | 0.01027 | 0.01021 | 0.01128 | 0.01226 | 0.01122 | 0.91 | 0.2794 |    |
| Ribulose 5-phosphate      | 0.00053 | 0.00058 | 0.00037 | 0.00051 | 0.00043 | 0.00056 | 0.00045 | 0.00038 | 0.00037 | 0.00043 | 0.00048 | 0.00044 | 0.90 | 0.3750 |    |
| Phosphocreatine           | 0.08845 | 0.08149 | 0.12987 | 0.07547 | 0.08883 | 0.06600 | 0.09141 | 0.08388 | 0.08983 | 0.08680 | 0.09282 | 0.08358 | 0.90 | 0.4194 |    |
| Carnitine                 | 0.02655 | 0.02967 | 0.02794 | 0.02903 | 0.02585 | 0.01822 | 0.02865 | 0.02189 | 0.02806 | 0.02656 | 0.02781 | 0.02467 | 0.89 | 0.2007 |    |
| Homoserine                | 0.00020 | 0.00036 | 0.00030 | 0.00027 | -       | -       | 0.00025 | -       | -       | -       | 0.00028 | 0.00025 | 0.89 | -      |    |
| 2-Hydroxyvaleric acid     | 0.00023 | 0.00022 | 0.00022 | 0.00019 | 0.00018 | 0.00021 | 0.00017 | 0.00017 | 0.00017 | 0.00017 | 0.00021 | 0.00018 | 0.87 | 0.0742 |    |

|                                   |         |         |         |         |         |         |         |         |         |         |         |         |                     |        |     |
|-----------------------------------|---------|---------|---------|---------|---------|---------|---------|---------|---------|---------|---------|---------|---------------------|--------|-----|
| Pro                               | 0.02409 | 0.03367 | 0.03548 | 0.02642 | 0.02866 | 0.02403 | 0.02865 | 0.02400 | 0.02684 | 0.02521 | 0.02966 | 0.02574 | 0.87                | 0.1493 |     |
| N5-Ethylglutamine                 | 0.00070 | 0.00078 | 0.00085 | 0.00061 | 0.00078 | 0.00068 | 0.00075 | 0.00056 | 0.00059 | 0.00054 | 0.00074 | 0.00062 | 0.84                | 0.0657 |     |
| Ala                               | 0.10116 | 0.12221 | 0.14222 | 0.12591 | 0.12599 | 0.09392 | 0.11248 | 0.10796 | 0.09468 | 0.10463 | 0.12350 | 0.10273 | 0.83                | 0.0314 | *   |
| Glutathione (GSH)                 | 0.02466 | 0.02757 | 0.02290 | 0.02064 | 0.01490 | 0.01737 | 0.01788 | 0.01973 | 0.01543 | 0.02043 | 0.02213 | 0.01817 | 0.82                | 0.1430 |     |
| Ribose 5-phosphate                | 0.00023 | -       | -       | 0.00020 | 0.00028 | 0.00019 | -       | -       | -       | -       | 0.00024 | 0.00019 | 0.82                | -      |     |
| Glycerol 3-phosphate              | 0.02541 | 0.02175 | 0.02292 | 0.02174 | 0.02180 | 0.01678 | 0.02120 | 0.01754 | 0.01594 | 0.02022 | 0.02272 | 0.01833 | 0.81                | 0.0091 | **  |
| PRPP                              | 0.00034 | 0.00045 | 0.00037 | 0.00032 | 0.00049 | 0.00041 | 0.00035 | 0.00032 | 0.00021 | 0.00026 | 0.00040 | 0.00031 | 0.79                | 0.1098 |     |
| Butyrylcarnitine                  | 0.00010 | 0.00019 | 0.00033 | -       | 0.00023 | -       | 0.00011 | -       | 0.00023 | 0.00016 | 0.00022 | 0.00017 | 0.79                | 0.4712 |     |
| Lys                               | 0.03336 | 0.04598 | 0.04817 | 0.04285 | 0.03533 | 0.03849 | 0.03803 | 0.01889 | 0.03498 | 0.03031 | 0.04114 | 0.03214 | 0.78                | 0.0905 |     |
| UTP                               | 0.00439 | 0.00421 | 0.00435 | 0.00431 | 0.00449 | 0.00310 | 0.00304 | 0.00382 | 0.00356 | 0.00343 | 0.00435 | 0.00339 | 0.78                | 0.0017 | **  |
| 2-Aminoisobutyric acid            | 0.00104 | 0.00146 | 0.00138 | 0.00075 | 0.00104 | 0.00078 | 0.00089 | 0.00080 | 0.00072 | 0.00123 | 0.00113 | 0.00088 | 0.78                | 0.1556 |     |
| 2-Aminobutyric acid               | 0.00178 | 0.00198 | 0.00146 | 0.00227 | 0.00265 | 0.00165 | 0.00182 | 0.00142 | 0.00131 | 0.00162 | 0.00203 | 0.00157 | 0.77                | 0.0882 |     |
| ADP-ribose                        | 0.01153 | 0.01075 | 0.01180 | 0.01179 | 0.01107 | 0.00847 | 0.00835 | 0.00868 | 0.00921 | 0.00891 | 0.01139 | 0.00872 | 0.77                | 0.0000 | *** |
| XC0061                            | 0.00055 | 0.00059 | 0.00045 | 0.00055 | 0.00045 | 0.00036 | 0.00050 | 0.00031 | 0.00039 | 0.00040 | 0.00052 | 0.00039 | 0.75                | 0.0181 | *   |
| XA0033                            | 0.00025 | 0.00034 | 0.00034 | 0.00035 | 0.00024 | -       | 0.00022 | -       | 0.00024 | 0.00023 | 0.00031 | 0.00023 | 0.75                | 0.0308 | *   |
| XC0132                            | 0.00025 | 0.00023 | 0.00020 | 0.00021 | 0.00020 | 0.00014 | 0.00018 | 0.00014 | 0.00018 | 0.00017 | 0.00022 | 0.00016 | 0.75                | 0.0045 | **  |
| S-Lactoylglutathione              | 0.00038 | 0.00046 | 0.00020 | 0.00036 | 0.00020 | 0.00020 | 0.00020 | 0.00036 | 0.00020 | 0.00022 | 0.00032 | 0.00024 | 0.74                | 0.2161 |     |
| Gly                               | 0.12393 | 0.11469 | 0.14076 | 0.10845 | 0.11607 | 0.08372 | 0.10211 | 0.10205 | 0.08693 | 0.06239 | 0.12078 | 0.08744 | 0.72                | 0.0076 | **  |
| Sarcosine                         | 0.00142 | 0.00122 | 0.00141 | 0.00152 | 0.00133 | 0.00109 | 0.00092 | 0.00100 | 0.00065 | 0.00103 | 0.00138 | 0.00094 | 0.68                | 0.0020 | **  |
| Ornithine                         | 0.00197 | 0.00341 | 0.00346 | 0.00233 | 0.00221 | 0.00194 | 0.00221 | 0.00115 | 0.00127 | 0.00242 | 0.00268 | 0.00180 | 0.67                | 0.0632 |     |
| NADH                              | 0.00017 | 0.00026 | 0.00017 | 0.00016 | 0.00023 | 0.00013 | -       | -       | -       | -       | 0.00020 | 0.00013 | 0.66                | -      |     |
| Ascorbic acid                     | 0.00122 | 0.00272 | 0.00277 | 0.00129 | 0.00150 | 0.00114 | 0.00183 | 0.00177 | 0.00070 | 0.00078 | 0.00190 | 0.00124 | 0.66                | 0.1639 |     |
| Phosphorylcholine                 | 0.00172 | 0.00222 | 0.00208 | 0.00184 | 0.00144 | 0.00090 | 0.00139 | 0.00106 | 0.00127 | 0.00141 | 0.00186 | 0.00120 | 0.65                | 0.0056 | **  |
| β-Ala                             | 0.00609 | 0.00784 | 0.00776 | 0.00626 | 0.00685 | 0.00540 | 0.00489 | 0.00456 | 0.00280 | 0.00454 | 0.00696 | 0.00444 | 0.64                | 0.0024 | **  |
| β-Ala-Lys                         | 0.00009 | 0.00016 | 0.00016 | 0.00012 | 0.00011 | -       | 0.00011 | 0.00006 | 0.00008 | -       | 0.00013 | 0.00008 | 0.63                | 0.0683 |     |
| 1-Methylnicotinamide              | 0.00010 | 0.00015 | 0.00010 | 0.00013 | 0.00011 | 0.00008 | 0.00005 | 0.00009 | 0.00006 | -       | 0.00012 | 0.00007 | 0.61                | 0.0091 | **  |
| Spermidine                        | 0.00075 | 0.00109 | 0.00060 | 0.00088 | 0.00096 | 0.00047 | 0.00056 | 0.00039 | 0.00065 | 0.00048 | 0.00085 | 0.00051 | 0.60                | 0.0104 | *   |
| Glyceraldehyde 3-phosphate        | 0.00014 | 0.00017 | 0.00010 | 0.00020 | 0.00027 | 0.00011 | 0.00011 | 0.00010 | 0.00011 | 0.00010 | 0.00018 | 0.00010 | 0.59                | 0.0670 |     |
| Dihydroxyacetone phosphate        | 0.01359 | 0.01550 | 0.00708 | 0.01710 | 0.01828 | 0.00871 | 0.00758 | 0.00834 | 0.00736 | 0.00830 | 0.01431 | 0.00806 | 0.56                | 0.0332 | *   |
| Spermine                          | 0.00018 | 0.00023 | 0.00016 | 0.00021 | 0.00022 | 0.00010 | 0.00008 | 0.00009 | 0.00016 | 0.00011 | 0.00020 | 0.00011 | 0.53                | 0.0010 | **  |
| N6-Methyllysine                   | 0.00101 | 0.00130 | 0.00115 | 0.00149 | 0.00103 | 0.00074 | 0.00080 | 0.00043 | 0.00052 | 0.00063 | 0.00120 | 0.00063 | 0.52                | 0.0012 | **  |
| Fructose 1,6-diphosphate          | 0.02614 | 0.03829 | 0.00989 | 0.04208 | 0.03931 | 0.01199 | 0.01147 | 0.01157 | 0.00990 | 0.01264 | 0.03114 | 0.01151 | 0.37                | 0.0301 | *   |
| Hydroxyproline                    | 0.02962 | 0.03298 | 0.03050 | 0.03077 | 0.02557 | 0.00988 | 0.01304 | 0.00902 | 0.00955 | 0.00942 | 0.02989 | 0.01018 | 0.34                | 0.0000 | *** |
| Taurocyamine                      | 0.00058 | 0.00064 | 0.00082 | 0.00048 | 0.00067 | 0.00018 | -       | -       | -       | -       | 0.00064 | 0.00018 | 0.29                | -      |     |
| 2-(Creatinine-3-yl)propionic acid | -       | -       | -       | 0.00009 | -       | -       | -       | -       | -       | -       | 0.00009 | -       | not detected in Old | -      |     |
| 6-Aminohexanoic acid              | 0.00017 | 0.00042 | 0.00032 | 0.00022 | 0.00027 | -       | -       | -       | -       | -       | 0.00028 | -       | not detected in Old | -      |     |
| Cystathionine                     | -       | -       | 0.00007 | 0.00010 | -       | -       | -       | -       | -       | -       | 0.00008 | -       | not detected in Old | -      |     |
| Isovalerylcarnitine               | -       | -       | 0.00019 | -       | -       | -       | -       | -       | -       | -       | 0.00019 | -       | not detected in Old | -      |     |
| threo-β-Methylaspartic acid       | -       | -       | -       | 0.00047 | -       | -       | -       | -       | -       | -       | 0.00047 | -       | not detected in Old | -      |     |
| XC0001                            | 0.00007 | 0.00006 | 0.00004 | -       | 0.00004 | -       | -       | -       | -       | -       | 0.00005 | -       | not detected in Old | -      |     |

Supplementary Table 2. List of gene expression of glycolytic pathway enzymes detected in microarray.

| Gene  | Accession no. | Description                                                     | Old vs Young |
|-------|---------------|-----------------------------------------------------------------|--------------|
| Hk1   | NM_001146100  | hexokinase 1 (Hk1), nuclear gene encoding mitochondrial protein | 0.78         |
| Hk2   | NM_013820     | hexokinase 2 (Hk2)                                              | 0.90         |
| Gpi1  | NM_008155     | glucose phosphate isomerase 1 (Gpi1)                            | 0.84         |
| Pfkm  | NM_021514     | phosphofructokinase, muscle (Pfkm)                              | 0.75         |
| Aldoa | NM_001177307  | aldolase A, fructose-bisphosphate (Aldoa)                       | 0.88         |
| Tpi1  | NM_009415     | triosephosphate isomerase 1 (Tpi1)                              | 0.83         |
| Gapdh | NM_008084     | glyceraldehyde-3-phosphate dehydrogenase (Gapdh)                | 0.77         |
| Pgk1  | NM_008828     | phosphoglycerate kinase 1 (Pgk1)                                | 0.87         |
| Pgam2 | NM_018870     | phosphoglycerate mutase 2 (Pgam2)                               | 0.86         |
| Eno3  | NM_001136062  | enolase 3, beta muscle (Eno3)                                   | 0.83         |
| Pkm   | NM_001253883  | pyruvate kinase, muscle (Pkm)                                   | 0.94         |

Supplementary Table 3. Mouse-specific primer pairs used for quantitative real-time RT-PCR.

| <b>Gene</b> | <b>Forward</b>        | <b>Reverse</b>             |
|-------------|-----------------------|----------------------------|
| 36B4        | GGCCCTGCACTCTCGCTTTC  | TGCCAGGACGCGCTTGT          |
| HK2         | GGAACCCAGCTGTTTGACCA  | CAGGGGAACGAGAAGGTGAAA      |
| Pfkm        | GCCATCGCCGTGTTGAC     | GCCCTGACGGCAGCATT          |
| Aldoa       | GTGGGAAGAAGGAGAACCTG  | CTGGAGTGTTGATGGAGCAG       |
| PKM         | TTGACTCTGCCCCATCAC    | GCAGGCCCAATGGTACAAAT       |
| MyHC- I     | CCAAGGGCCTGAATGAGGAG  | GCAAAGGCTCCAGGTCTGAG       |
| MyHC- II a  | AAGCGAAGAGTAAGGCTGTC  | GTGATTGCTTGCAAAGGAAC       |
| MyHC- II b  | ACAAGCTGCGGGTGAAGAGC  | CAGGACAGTGACAAAGAACG       |
| Gpd1        | GTGAGACGACCATCGGCTG   | TTGGGTGTCTGCATCAGGT        |
| Chkb        | GCAAGACCCACGGACTACC   | CAGGGAGTACCGACTGATCTC      |
| Lypla2      | AACACCATGTCTGTGCCCT   | CTGTGCCCTGTGTCTCCAAGT      |
| Gpcpd1      | ACATCGTGGTGCAGGGAAT   | AAATGCTGCGCCATGACTG        |
| Odc1        | GCAGTCAACATCATTGCCAA  | TGTTCAATTTGACTCATCTTCATCGT |
| Amd2        | TTTCACCGTGGCCTTCAGAT  | GCCTCCTCCCTCTGGTCAGT       |
| Smox        | CACAGAGAGCTCCAAGACAGC | GGGCACTTGGATGGTAAAAG       |
| Chrna1      | GGTGTTCTACCTGCCACAG   | GCTCCACAATGACCAGAAGG       |
| Ache        | CAGCGCCACCGATACTCTG   | CCTGCTTGCTATAGTGGTCGAAC    |
| Col1a1      | GACGCCATCAAGGTCTACTG  | ACGGGAATCCATCGGTCA         |
| Col3a1      | GCCCACAGCCTTCTACAC    | CCAGGGTCACCATTTCTC         |
| Col6a2      | GAACTTCCCTGCCAAACAGA  | CACCTTGTGGAAGTTCTGCTC      |

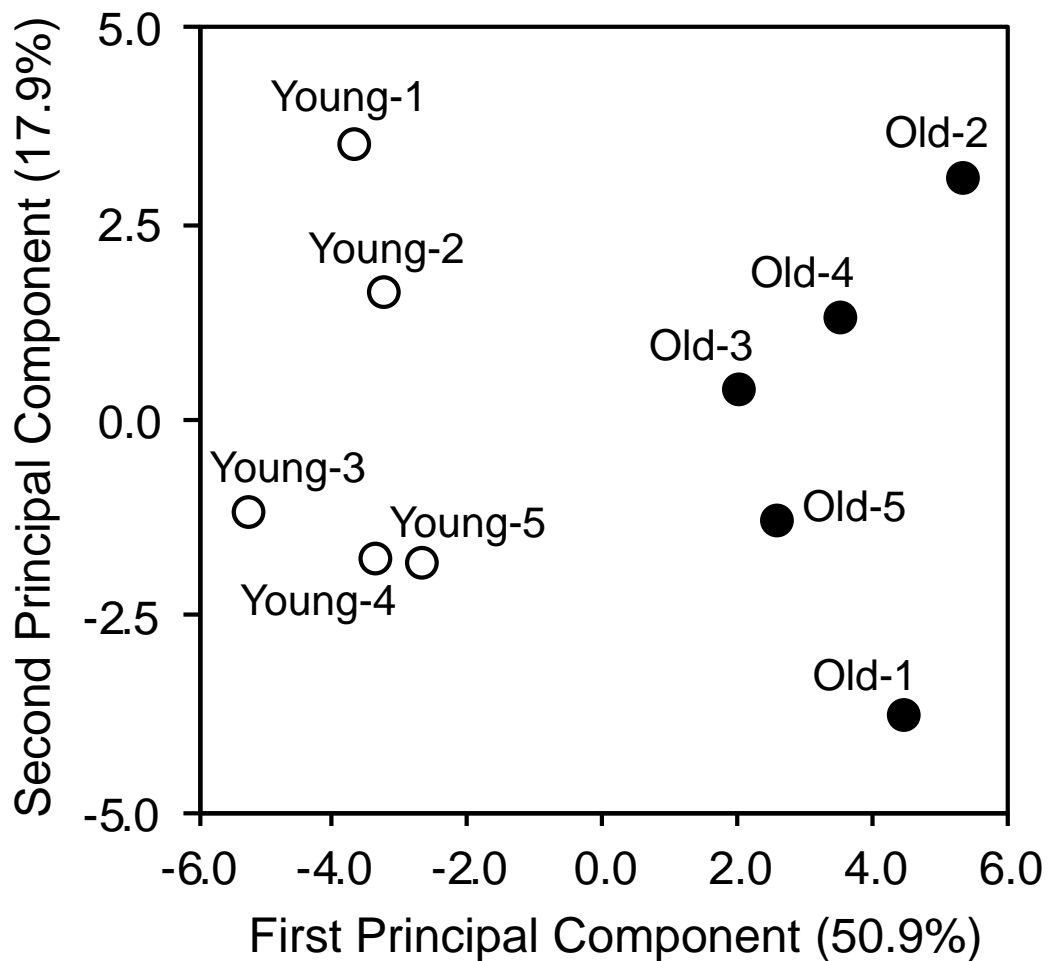

**Supplementary Fig. 1. Plot of PCA of detected phosphatidylcholine (PC)/phosphatidylethanolamine (PE) peaks in lipid extracts from young and aged mice.**

Five mice were used in each group (Young-1 to Young-5 for young mice and Old-1 to Old-5 for aged mice). The mice were same as used in Fig. 1. Plots of young (open circles) and aged mice (filled circles) are clearly distinguished on the first principal component axis (x-axis).



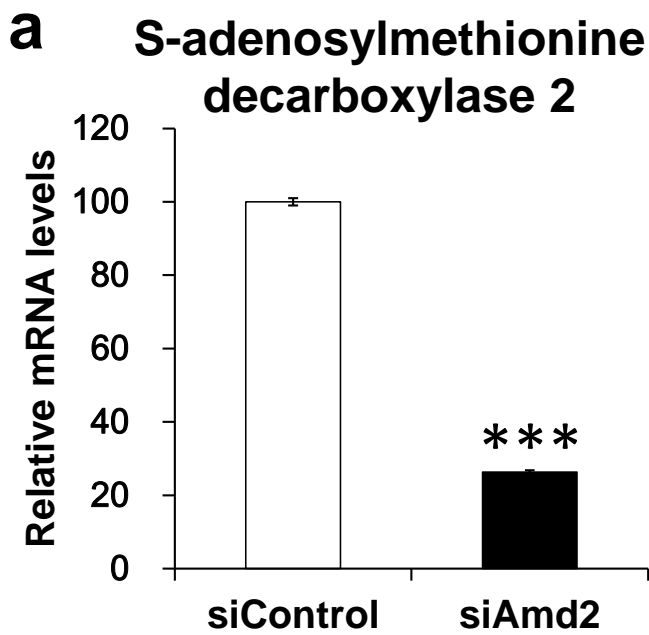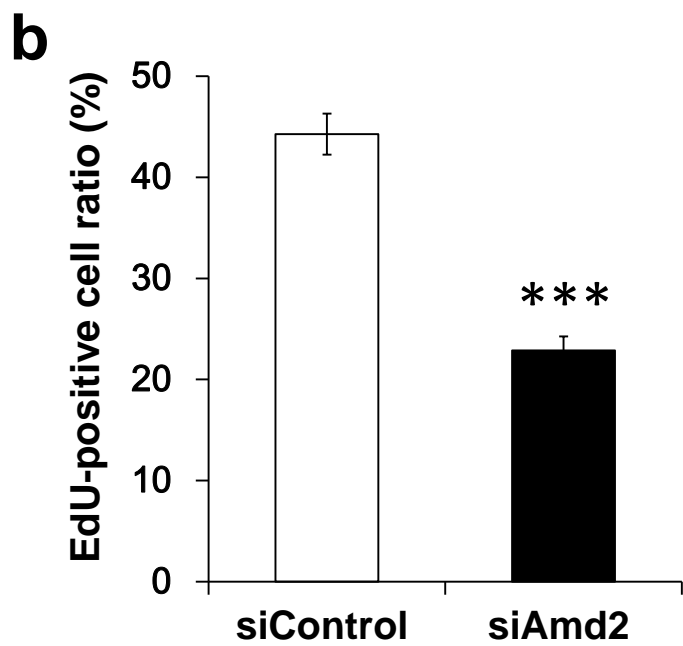

**Supplementary Fig. 2. Knockdown of S-adenosylmethionine decarboxylase (Amd2) mRNA, and decreased cell proliferation of primary myoblasts.**

a) siRNA successfully decreased Amd2 mRNA level. Data are expressed as mean  $\pm$  SE (N = 4); \*\*\*p < 0.001.

b) Incorporation of EdU decreased following treatment of siRNA of Amd2. Data are expressed as mean  $\pm$  SE (N = 8); \*\*\*p < 0.001.
