# Supplementary material for: Metabolomic Analysis of Skeletal Muscle in Aged Mice
Source: PubMed Central journal article supplement (PMC6639307; doi:10.1038/s41598-019-46929-8), 2019-07-18
Supplement: 41598_2019_46929_MOESM2_ESM.pdf [file 41598_2019_46929_MOESM2_ESM.pdf]

In accordance to Nature Publishing Groups Authorship Policy we agree to change the authors of the manuscript as indicated below.

**NAME OF JOURNAL:** Scientific Reports

**TITLE OF MANUSCRIPT:** Metabolomic Analysis of Skeletal Muscle in Aged Mice

**MANUSCRIPT NUMBER:** SREP-19-05029

**CORRESPONDING AUTHORS NAME:** Yasutomi Kamei

**PREVIOUS AUTHOR NAMES:**

Ran Uchitomi, Yukino Hatazawa, Takahiko Shimizu, Yasutomi Kamei

**UPDATED AUTHOR NAMES:**

Ran Uchitomi, Yukino Hatazawa, Nanami Senoo, Kiyoshi Yoshioka, Mariko Fujita, Takahiko Shimizu, Shinji Miura, Yusuke Ono, Yasutomi Kamei

**CHANGE TO AUTHOR LIST:** Nanami Senoo, Kiyoshi Yoshioka, Mariko Fujita, Shinji Miura, Yusuke Ono were added as authors.

| Print Name       | Signature        | Date          |
|------------------|------------------|---------------|
| Ran Uchitomi     | Ran Uchitomi     | June 10, 2019 |
| Yukino Hatazawa  | Yukino Hatazawa  | June 10, 2019 |
| Nanami Senoo     | Nanami Senoo     | June 10, 2019 |
| Kiyoshi Yoshioka | Kiyoshi Yoshioka | June 10, 2019 |
| Mariko Fujita    | Mariko Fujita    | June 10, 2019 |
| Takahiko Shimizu | Takahiko Shimizu | June 10, 2019 |
| Shinji Miura     | Shinji Miura     | June 10, 2019 |
| Yusuke Ono       | Yusuke Ono       | June 10, 2019 |
| Yasutomi Kamei   | Yasutomi Kamei   | June 10, 2019 |
|                  |                  |               |
